# Supplementary material
Source: Research Square preprint supplement (doi:10.21203/rs.3.rs-9097721/v1)
Supplement: Supplementary file 1 [file 357669bab1a206871f08536a.docx]

**Supplementary File 1**

English-language version of the Blended Teaching Effectiveness Questionnaire developed for this study

## Questionnaire for Blended Teaching Based on a Digital Teaching Assistant and Knowledge Graph

## Part I. Pre-test Questionnaire (Baseline period: two weeks before the intervention)

### Instructions

Dear student, this questionnaire aims to understand your learning background, expectations toward blended teaching, and daily learning habits. The questionnaire is anonymous and there are no right or wrong answers. Please answer according to your real situation. The questionnaire takes approximately 10 minutes to complete.

### Section 1. Basic Information

- Major: ______
- Grade: Class of 2025
- Gender: □ Male □ Female
- Have you previously taken similar courses? □ Yes □ No
- Experience using online learning platforms: □ None □ Occasionally □ Frequently □ Proficient

### Section 2. Learning Foundation

Knowledge Structure Cognition (Multiple choice):

1. When facing a new course, how do you organize knowledge relationships? A. Draw mind maps B. List notes C. Memorize isolated knowledge D. Do not organize
2. Your understanding of knowledge graphs: A. Deep understanding B. Heard of it C. Only heard the term D. Never heard
3. Sensitivity to logical relationships between knowledge points: A. Identify quickly B. Understand after hints C. Focus on single points D. Unaware
4. Ability to use digital tools for learning: A. Skilled B. Basic operation C. Simple browsing D. Rarely use
5. Previous performance in similar courses: A. ≥85 B. 70–84 C. 60–69 D. <60

Self‑evaluation Scale (1 = Strongly disagree, 5 = Strongly agree):

- I can clearly organize the core concepts of learned knowledge.
- I have basic abilities in data analysis and summarization.
- I can identify weaknesses in my learning.
- I understand the disciplinary background related to the course.
- I can use tools to create learning notes or outlines.
- I can connect abstract knowledge with real cases.
- I can filter online information effectively.
- I can adapt quickly to new teaching tools.
- I can independently complete pre‑class preparation.
- I can restate the logical framework of knowledge.

### Section 3. Student Expectations (1–5 Likert scale)

- I expect knowledge graphs to help visualize course knowledge.
- I believe the digital teaching assistant can answer questions quickly.
- I am willing to participate in online pre‑class preparation and offline practice.
- I expect personalized tasks to improve learning efficiency.
- Knowledge graphs can help build a systematic knowledge structure.
- I worry the digital assistant may misunderstand my questions.
- I expect practical learning in a digital interactive laboratory.
- Blended teaching will be more engaging than traditional teaching.
- I worry knowledge graph operation may be complex.
- I am willing to explore extended resources in the knowledge graph.

### Section 4. Learning Behavior Habits (1–5 Likert scale)

- I preview course content before class.
- I use online tools to solve learning problems.
- I record and solve learning questions.
- I complete online learning tasks such as videos or quizzes.
- I collaborate with classmates during learning tasks.
- I review learned knowledge regularly.
- I rarely use online platforms to obtain learning resources.
- I arrange time for preview and review effectively.
- I summarize experiences after practical activities.
- I provide feedback on teaching.

### Section 5. Open‑ended Questions

1. What is the biggest difficulty you encountered when using online learning tools?

2. Which aspect of the blended teaching model do you expect most?

## Part II. Mid-test Questionnaire (During the intervention period)

This questionnaire evaluates your learning experience during the early stage of the blended teaching implementation.

### Section 1. Basic Information

Anonymous code: ______

Participated teaching components: □ Pre‑class knowledge graph exploration □ In‑class practical operation □ Both

### Section 2. Effectiveness of the Pre‑class Stage (Likert scale)

- The knowledge graph presentation clarified the course framework.
- The graph pathway planning guided my preview.
- The difficulty of preview tasks matched the knowledge graph.
- I could independently explore the knowledge graph.
- Pre‑class platform resources were easy to access.
- The pre‑class stage improved my understanding.
- I used the digital assistant during preview.
- Knowledge points in the graph were clearly labeled.
- The preview time requirement was reasonable.
- The pre‑class stage increased my interest in the course.

### Section 3. Effectiveness of the In‑class Stage

- Teacher explanations with knowledge graphs were easier to understand.
- Case analysis connected well with graph knowledge points.
- Digital laboratory equipment was easy to operate.
- Practical tasks reinforced core knowledge.
- The digital assistant answered questions during class.
- The assistant's responses were accurate and clear.
- Collaborative tasks improved knowledge application.
- Online platform functions were useful in class.
- The teacher addressed personalized learning needs.
- The class pace was reasonable.

## Part III. Post-test Questionnaire (One week after the intervention)

### Section 1. Basic Information

Anonymous code: ______

Attendance: □ Full □ Absent 1–2 times □ Absent ≥3 times

### Section 2. Knowledge Graph Understanding (Likert scale)

- I can explain the concept and functions of knowledge graphs.
- I can identify relationships among knowledge points.
- I can locate my weak knowledge areas using the graph.
- I can review course content using the knowledge graph.
- I can expand learning through graph resources.
- The knowledge graph helped build a complete knowledge system.
- I understand the design logic of graph modules.
- I can apply knowledge graphs to solve problems.
- I would recommend knowledge graphs to other students.
- Knowledge graphs improved my structured thinking ability.

### Section 3. Effectiveness of the Blended Teaching Model

- The connection between pre‑class, in‑class, and post‑class learning was smooth.
- Blended teaching improved my learning efficiency.
- The digital assistant provided effective support.
- Personalized evaluation reflected my learning results.
- Graph resources met my differentiated learning needs.
- The course stimulated deeper learning interest.
- The learning pathway clarified future learning direction.
- The digital laboratory improved my practical ability.
- Blended teaching improved my self‑learning ability.
- Blended teaching improved my problem‑solving ability.

### Section 4. Course Design Evaluation

- Rationality of the three‑stage course design
- Fit between knowledge graph and course content
- Match between digital assistant functions and learning needs
- Usability of the online teaching platform
- Quality of pre‑class tasks
- Relevance of in‑class practice
- Effectiveness of post‑class consolidation tasks
- Teacher guidance in blended teaching
- Abundance of course resources
- Overall learning experience

### Section 5. Open‑ended Questions

1. Which function of the digital teaching assistant needs improvement?

2. In what aspects could the knowledge graph be improved?

3. What suggestions do you have for improving this blended teaching model?

4. Which part of the course benefited you the most?
